# Supplementary material
Source: PubMed Central journal article supplement (PMC7029121)
Supplement: supp_RA119.011775_156930_1_supp_438054_q1y3z7.pdf [file supp_RA119.011775_156930_1_supp_438054_q1y3z7.pdf]

# The motif ExExxxL in the cytosolic tail of the secretory human proprotein convertase PC7 regulates its trafficking and cleavage activity

Lorelei Durand, Stéphanie Duval, Alexandra Evagelidis, Johann Guillemot, Vahid Dianati, Emilia Sikorska, Peter Schu, Robert Day and Nabil G. Seidah.

## SUPPORTING INFORMATION

- Figure S-1: Localization of human PC7-CT mutants in the Trans-Golgi network or early endosomes.  
 Figure S-2: Overexpression and co-localization of adaptor-proteins (AP) and human PC7 or its CT mutant.  
 FigureS-3: Overexpression and co-localization of adaptor-proteins (AP) and human Tfr1.  
 Table S-1: Oligonucleotides used in PCR for site-directed mutagenesis of hPC7 and its mutants

**Supporting information Figure S1. Localization of human PC7-CT mutants in the Trans-Golgi network or early endosomes.** (A)(B) Immunofluorescence of CT mutants (red) on permeabilized HeLa cells in the presence of (A) cell compartments Golgin-97 marker or (B) Early Endosomal marker are labeled in green. Cell nuclei are marked by DAPI (blue). Quantification of co-localization between hPC7 mutants and Golgin-97 (A) or with EEA1 (D) was performed using IMARIS software. These results are representative of minimum three independent experiments and quantification representative of N=15 cells. Error bars indicate averaged values  $\pm$  standard error of the mean (SEM). \*,  $P < 0.1$ , \*\*,  $P < 0.01$ , \*\*\*,  $P < 0.001$ , *ns*: not significant (Student's *t*-test). Bar = 1  $\mu$ m.

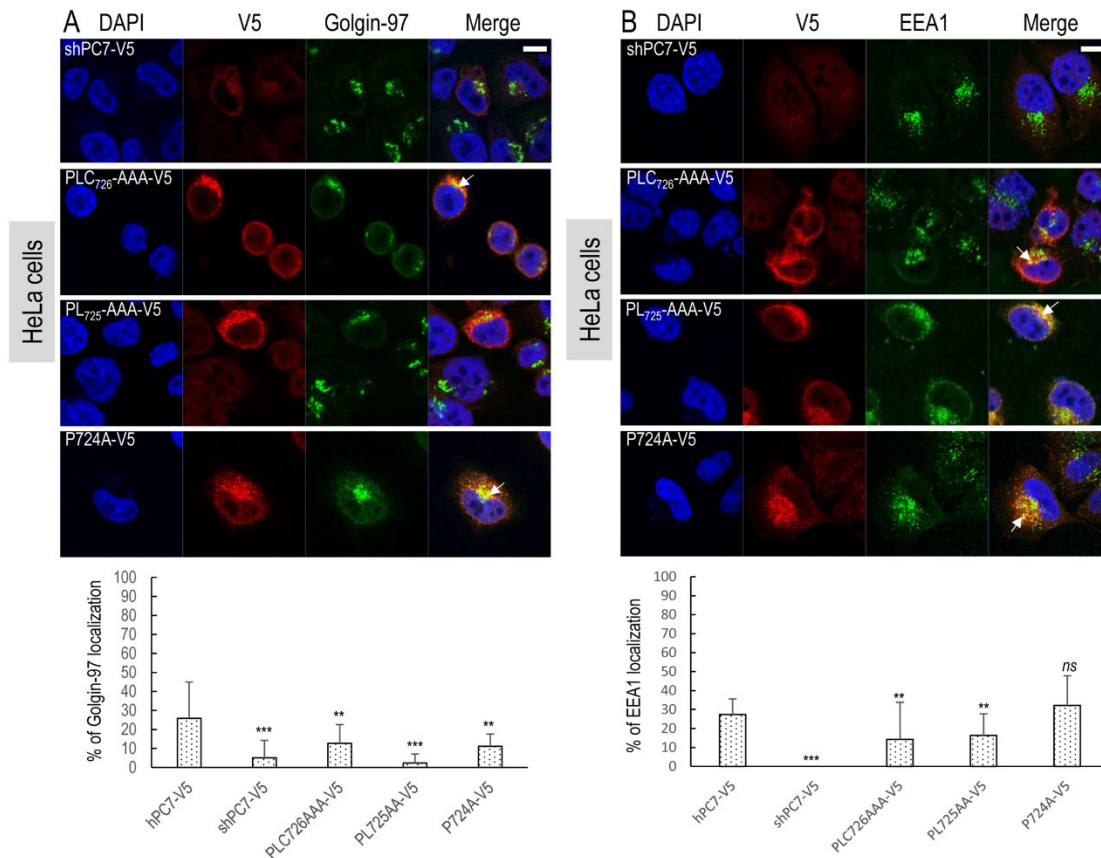

**Supporting information Figure S2. Overexpression and co-localization of adaptor-proteins (AP) and human PC7 or its CT mutants.** Immunofluorescence of hPC7 or its CT mutants (red) in the presence of AP proteins (green), on permeabilized HeLa cells. Cell nuclei are marked by DAPI (blue). Quantification, using IMARIS software, of the co-localization between hPC7 or its mutants with of overexpressed AP-1 $\mu$  or AP-2 $\mu$ . These results are representative of minimum three independent experiments and quantification is representative of N=15 cells. Error bars indicate averaged values  $\pm$  SD. \*, P < 0.1, \*\*, P < 0.01, \*\*\*, P < 0.001, ns: not significant (Student's *t*-test). Bar = 1  $\mu$ m.

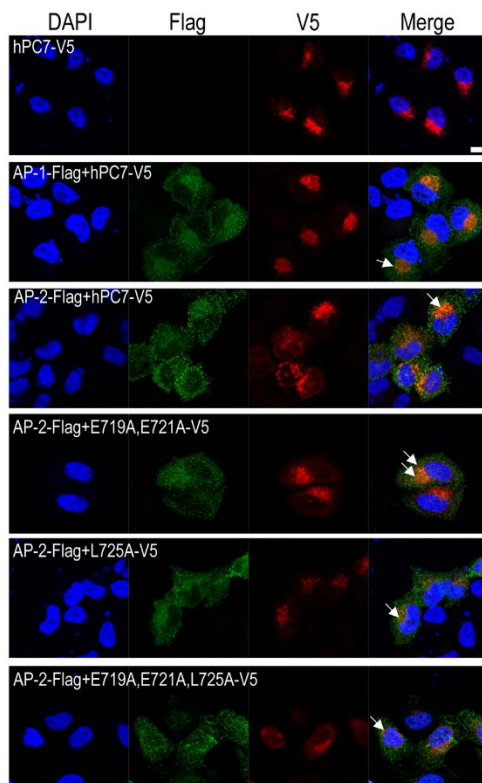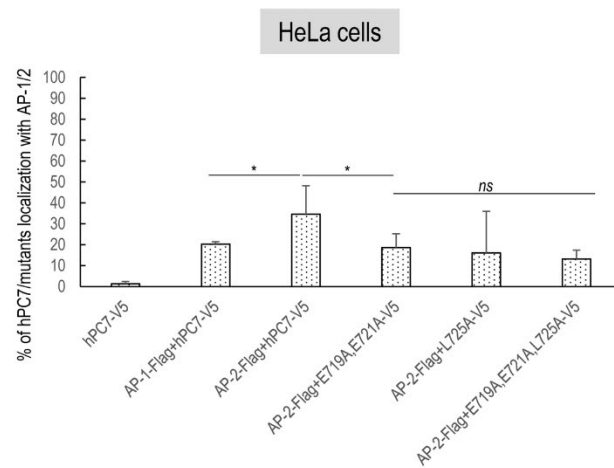

**Supporting information Figure S3. Overexpression and co-localization of adaptor-proteins (AP) and human TfR1.** Immunofluorescence of overexpressed hTfR1 (green) and (A) endogenous EEA1 (red) or (B) Golgin-97 (red) in permeabilized HeLa cells following 48 hours incubation with an AP-2 siRNA or its control (scrambled siRNA). Cell nuclei are marked by DAPI (blue). Quantification, using IMARIS software, of the co-localization between hTfR1 and EEA1 or Golgin-97. These results are representative of minimum three independent experiments and quantification is derived from N=15 cells per condition. Error bars indicate averaged values  $\pm$  SD. \*,  $P < 0.1$ , \*\*,  $P < 0.01$ , \*\*\*,  $P < 0.001$ , *ns*: not significant (Student's *t*-test). Bar = 1  $\mu$ m

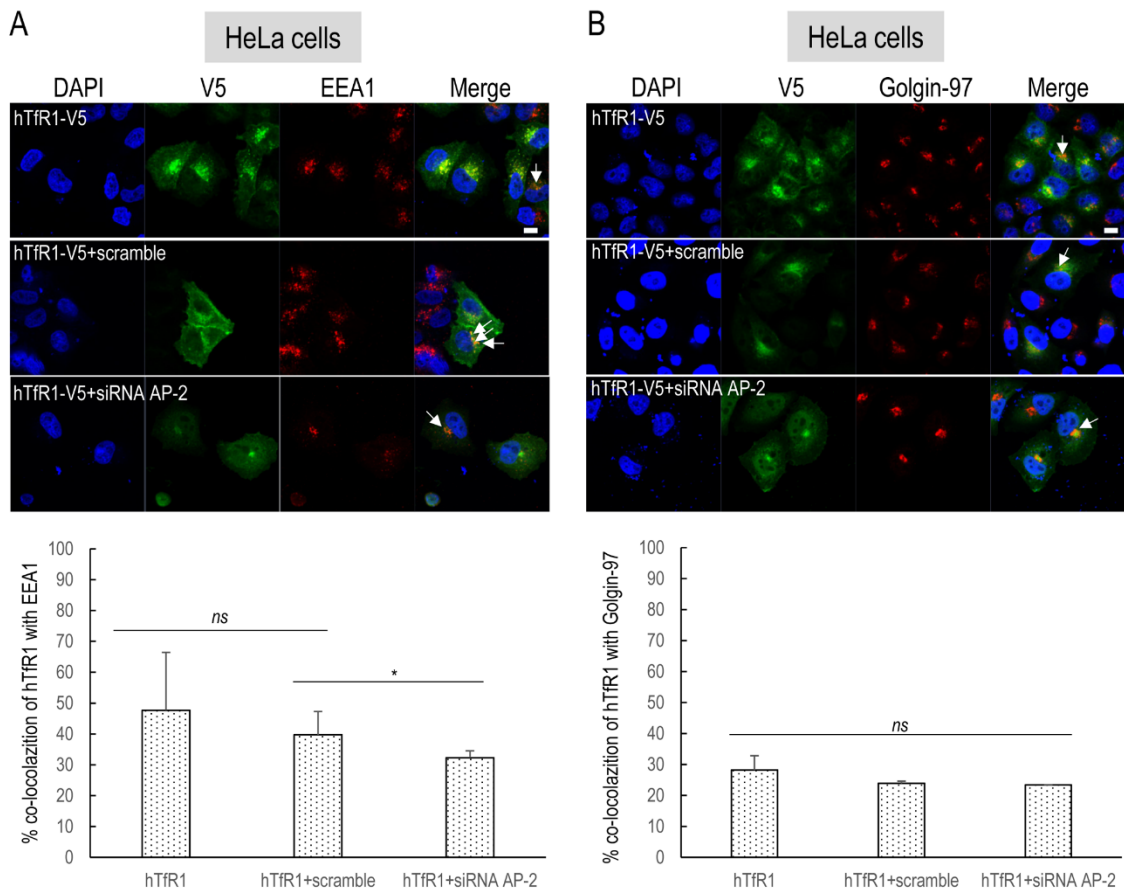

| TABLE S1. Oligonucleotides used in PCR for site-directed mutagenesis of hPC7 and its mutants |                                              |                                             |
|----------------------------------------------------------------------------------------------|----------------------------------------------|---------------------------------------------|
| mutants or chimeras                                                                          | forward                                      | reverse                                     |
| hPC7+xTMCT                                                                                   | ACCCTCAAGACCTTGTGCTGTTGGGCTG                 | GCAACAAGGTCTTGAGGGTGTGGGGG                  |
| hPC7+xCT                                                                                     | GGAAGTATATTTGTCTCAGGGTTCTAGCGACGG            | CCCTGAGACAAATATACTTCCAGCATGTAGTAAAC         |
| xPC7+hTMCT                                                                                   | CACCCTTCGGACACTGGTGTGGTAGGCTGTTTC            | GAAACAGCCTACCAGCACCAGTGTCCGAAGGGTG          |
| xPC7+hCT                                                                                     | CACATTGGAGTTGTAAGTGGAGCCAGAGGAATGTGGC        | GCCACATTCCTCTGGCTCCAGTACAACCTCCAATGTG       |
| L668X (soluble)                                                                              | GCCACCCGGTATGAGGATCG                         | GACACCCGGTGGTCTTGAGGGTGTGGGGG               |
| Q690X ( $\Delta$ CT)                                                                         | GCCACCCGGTATGAGGATCG                         | GCCTCGACTCAGCTCAAATATACTTCCAGCATG           |
| G717X                                                                                        | GCCACCCGGTATGAGGATCG                         | CCCGTCGACTCACTTCTCCTTGGCTTTCC               |
| L753X                                                                                        | GCCACCCGGTATGAGGATCG                         | CCCGTCGACTCACAGCAGGTCTGGGGC                 |
| PLC726-AAA                                                                                   | CTGGCAGCTGCCACTGATTCTAGC                     | GTGGCAGCTGCCAGCAGCAAGG                      |
| P724A                                                                                        | GAATCAGTGGCACTTTGCAG                         | GCTGCTGCAAAGTGCCACTG                        |
| L725A                                                                                        | GAATCAGTGGCACTTTGCAGC                        | GCTGCTGCAAAGTGCCACTG                        |
| C726A                                                                                        | GCCACTTGCCAGCAGCAAGG                         | CCTTGCTGCTGCAAGTGGC                         |
| C726F                                                                                        | CCACTTTTCAGCAGCAAGGATCC                      | GGATCCTTGCTGCTGAAAAGTGGCACTG                |
| E719A                                                                                        | AAGGGACAGCGCTAGAATCAGTGCC                    | CTGATTCTAGCGCTGTCCCTTCTCCTTGGC              |
| E721A                                                                                        | CAGAGCTAGCATCAGTGCCAC                        | GTGGCACTGATGCTAGCTCTG                       |
| E719A,E721A                                                                                  | CACTGATGCTAGCGCTGTCCCTTCC                    | GACAGCGCTAGCATCAGTGCCACTTTG                 |
| E733A,E735A                                                                                  | CTGTTGCCACTGCGTCTGGATCC                      | CCAGACGCAGTGGCAACAGAGAGC                    |
| ELE721-AAA                                                                                   | CCAAGGAGGAAGGGACAGCGGCAGCATCAGTGCCACTTTGCAGC | GCTGCAAAGTGGCACTGATGCTGCCGCTGTCCCTTCTCCTTGG |
| E719A,E721A,L725A                                                                            | GAAGGGACAGCGCTAGCATCAGTGCCAGCTTGCAG          | CTGCAAAGTGGCACTGATGCTAGCGCTGTCCCTTCC        |
| ESV723-AAA                                                                                   | CAGAGCTAGCAGCAGCGCCACTTTGC                   | GCAAAGTGGCGCTGCTGCTAG                       |
| S722A                                                                                        | CAGAGCTAGAAGCAGTGCCACTTTGCAGC                | GCTGCAAAGTGGCACTGCTTCTAGCTCTG               |
| V723A                                                                                        | CAGAGCTAGAATCAGCGCCACTTTGCAGC                | GCTGCAAAGTGGCGCTGATTCTAGCTCTG               |
